# Supplementary material
Source: Springer Nature journal article supplement (https://www.springermedizin.de/resource/supplementary/12889_2006_500_MOESM3_ESM.pdf/9501012)

# INTRAGENERATIONAL MOBILITY INTO AND OUT OF WORKFORCE

Workforce participation  
 Yes = Inside the workforce  
 No = Outside the workforce

## Cardiovascular mortality

## All-cause mortality

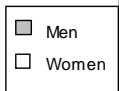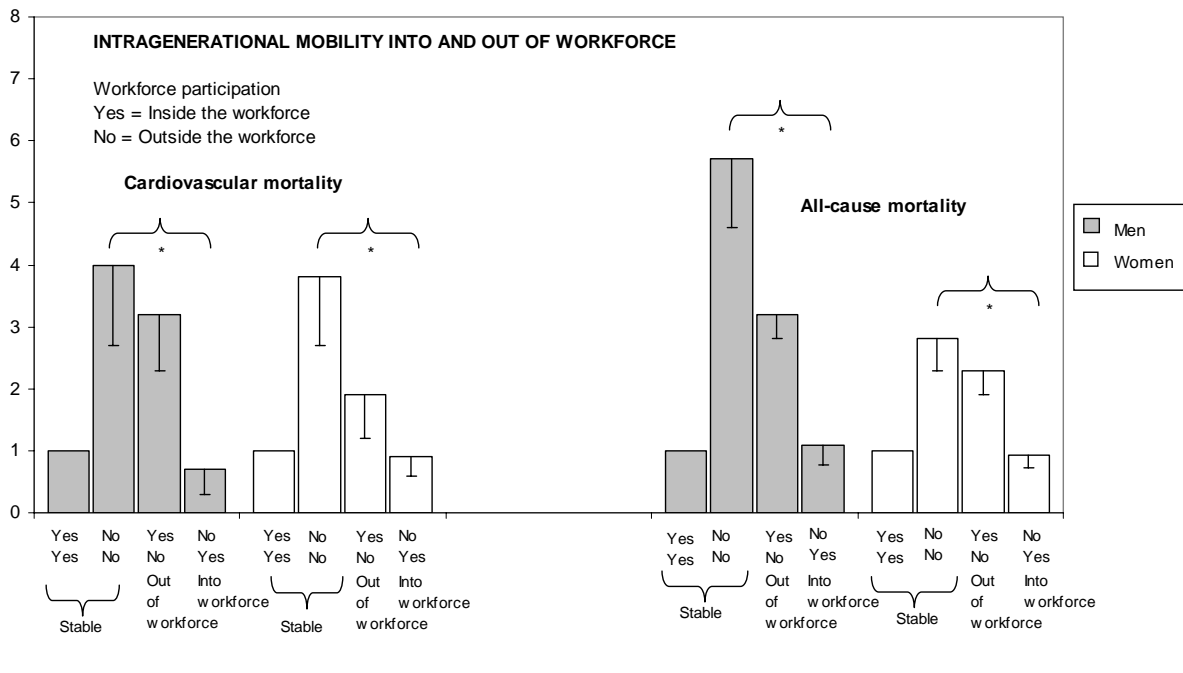

Supplement: MOESM3 [file 9501012]
